# Supplementary material for: Vertical partitioning of CO 2 production in a Dystric Cambisol
Source: Copernicus journal article supplement (doi:10.5194/bg-2019-143), 2019-04-26
Supplement: Supplementary file 1 [file bg-2019-143-supplement.pdf]

Supplement of  
Vertical partitioning of CO<sub>2</sub> production in a Dystric Cambisol

Patrick Wordell-Dietrich, Axel Don, Anja Wotte, Janet Rethemeyer, Jörg Bachmann, Mirjam Helfrich, Kristina Kirfel, and Christoph Leuschner

Correspondence to: Patrick Wordell-Dietrich ([patrick.wordell-dietrich@tu-dresden.de](mailto:patrick.wordell-dietrich@tu-dresden.de))

Compensation algorithm of dependence of pressure and temperature for GMP221:

$$c_{[i+1]} = c_1 - k_{p1}[c_i] \times \left( \frac{p-1013}{1013} \right)^2 - k_{p2}[c_i] \times \left( \frac{p-1013}{1013} \right) \times p - k_{t1}[c_i] \times \left( \frac{T-25}{25} \right)^3 - k_{t2}[c_i] \times \left( \frac{T-25}{25} \right)^2 - 16320 \times (-(k_{t3}[c_i])^2 + k_{t3}[c_i]) \times \left( \frac{T-25}{25} \right)$$

S1

where  $i \in \{1,2,3,4\}$ ,  $c_{(i+1)}$  [ppm] is the compensated CO<sub>2</sub> reading in the iteration process,  $c_i$  is the uncompensated reading in [ppm],  $p$  is the pressure in [hPa],  $T$  is the temperature in [°], and  $k_{p1}$ ,  $k_{p2}$ ,  $k_{t1}$ ,  $k_{t2}$  and  $k_{t3}$  are empirical derived functions.

$$k_{p1}[c_i] = A_{p1} \times c_i^4 + B_{p1} \times c_i^3 + C_{p1} \times c_i^2 + D_{p1} \times c_i$$

S2

$$k_{p2}[c_i] = A_{p2} \times c_i^3 + B_{p2} \times c_i^2 + C_{p2} \times c_i$$

S3

$$k_{t1}[c_i] = A_{t1} \times c_i^3 + B_{t1} \times c_i^2 + C_{t1} \times c_i + D_{t1}$$

S4

$$k_{t2}[c_i] = A_{t2} \times c_i^2 + B_{t2} \times c_i$$

S5

$$k_{t3}[c_i] = A_{t3} \times c_i^3 + B_{t3} \times c_i^2 + C_{t3} \times c_i$$

S6

where  $c_i$  is the CO<sub>2</sub> concentration in [%] and  $A, B, C, D$  are empirical derived constants (Table S1).

Table S1: Empirical derived constants for temperature and pressure compensation

|                   |          |                   |            |                   |          |                   |         |                   |            |
|-------------------|----------|-------------------|------------|-------------------|----------|-------------------|---------|-------------------|------------|
| A <sub>p1</sub> = | 0.97501  | A <sub>p2</sub> = | -9.3269E-3 | A <sub>t1</sub> = | 0.046481 | A <sub>t2</sub> = | -3.0166 | A <sub>t3</sub> = | 8.3600E-5  |
| B <sub>p1</sub> = | -54.1519 | B <sub>p2</sub> = | 0.14345    | B <sub>t1</sub> = | -1.02280 | B <sub>t2</sub> = | -8.8421 | B <sub>t3</sub> = | -2.4199E-3 |
| C <sub>p1</sub> = | 479.778  | C <sub>p2</sub> = | 15.7164    | C <sub>t1</sub> = | -37.4433 |                   |         | C <sub>t3</sub> = | 0.066814   |
| D <sub>p1</sub> = | -11362.8 |                   |            | D <sub>t1</sub> = | -49.000  |                   |         |                   |            |

The compensated reading was calculated in an iterative process. In the first iteration loop ( $i=1$ ),  $c_2$  was calculated from equation (1) by using  $c_1$  for S2-S5. The obtained  $c_2$  was then used in the following loop and so on. The iteration stops at the last  $c_5$ , which was the temperature and pressure corrected reading.

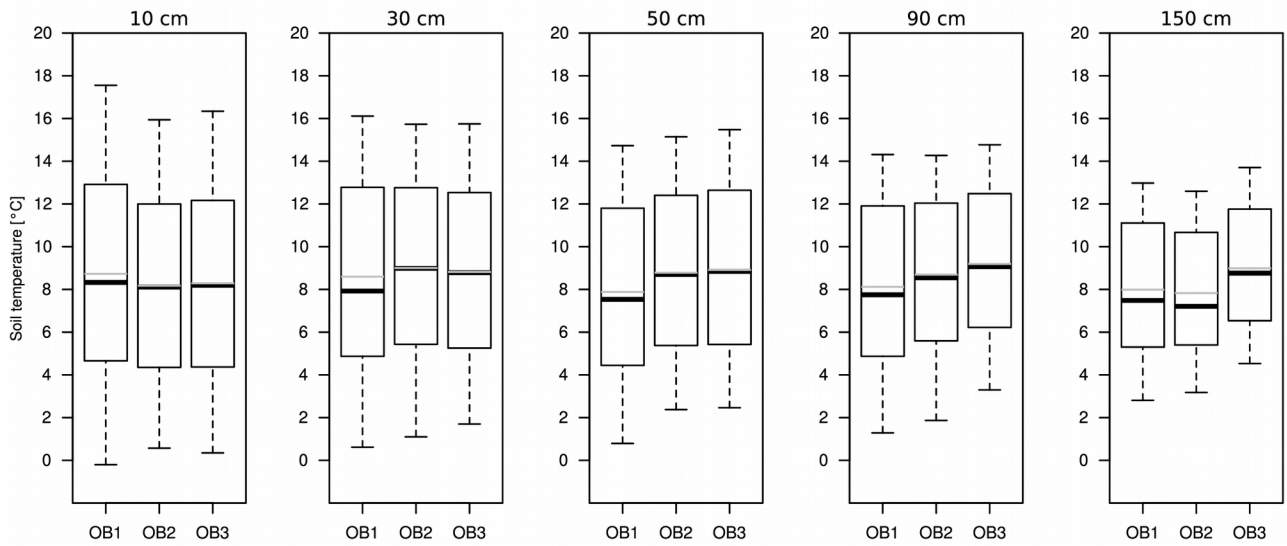

Figure S1. Box-whisker-plot of soil temperature for each soil depth and observatory (OB). Medians and means are shown as black and grey lines respectively.

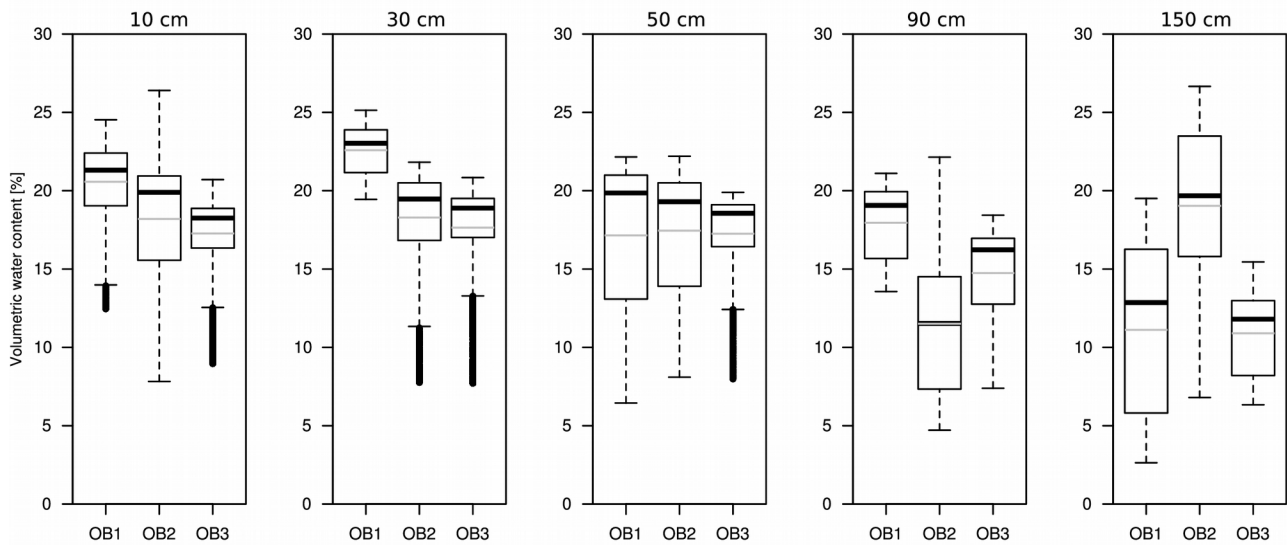

Figure S2. Box-whisker-plot of volumetric water content for each soil depth and observatory (OB). Medians and means are shown as black and grey lines respectively.
